# Supplementary material for: Commensal-infected macrophages induce dedifferentiation and reprogramming of epithelial cells during colorectal carcinogenesis
Source: PubMed Central journal article supplement (PMC5731944; doi:10.18632/oncotarget.22250), 2017-11-01
Supplement: oncotarget-08-102176-s001.pdf [file oncotarget-08-102176-s001.pdf]

## Commensal-infected macrophages induce dedifferentiation and reprogramming of epithelial cells during colorectal carcinogenesis

### SUPPLEMENTARY MATERIALS

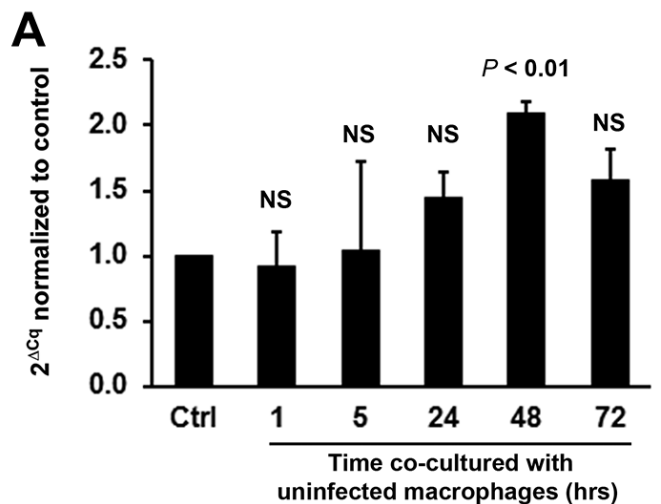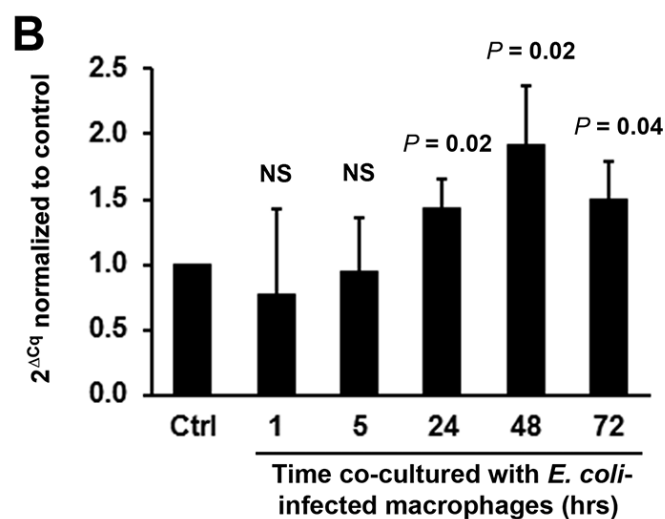

**Supplementary Figure 1: *Ctnnb1* expression in YAMC cells exposed to uninfected and *E. coli*-infected macrophages.** (A), *Ctnnb1* expression in YAMC cells transiently increases after 48 hrs treatment with uninfected macrophages compared to untreated control. (B), *Ctnnb1* expression increases after 24 - 72 hrs treatment with *E. coli* DH5 $\alpha$ -infected macrophages compared to untreated control. NS, not significant. Data represent mean  $\pm$  SD for 3 independent experiments.

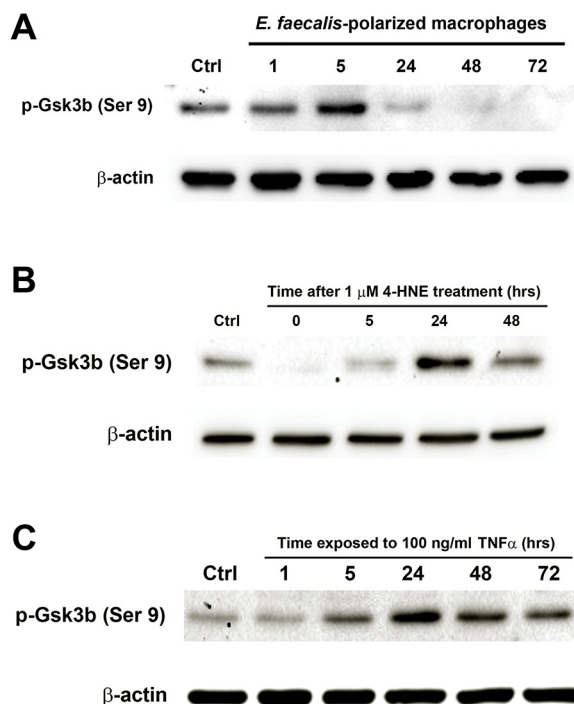

**Supplementary Figure 2: MIBE-induced phosphorylation of Gsk3β (Ser<sup>9</sup>).** (A), Phosphorylated Gsk3β (Ser<sup>9</sup>) is transiently increased in YAMC cells exposed to *E. faecalis*-infected macrophages for 5 hrs and decreased afterwards. (B), p-Gsk3β (Ser<sup>9</sup>) is transiently increased 24 hrs after 1 hr treatment with 4-HNE. (C), Increased p-Gsk3β is also noticed for cells treated with TNFα for 24 hrs and subsequently decreased.

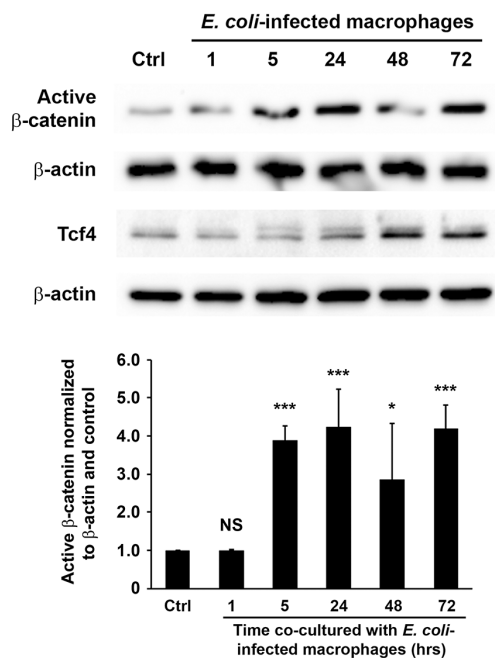

**Supplementary Figure 3: Activation of β-catenin by *E. coli*-infected macrophages.** Western blots show increased active β-catenin and Tcf4 (upper) in YAMC cells exposed to *E. coli*-infected macrophages (100 multiplicity of infection) after normalization to β-actin and untreated controls (lower). Data represent mean ± SD for 3 independent experiments.

Supplementary Table 1: Primers for qRT-PCR

| Genes                | Primer sequence (bp)            | PCR product |
|----------------------|---------------------------------|-------------|
| Human <i>ACTB</i>    |                                 | 148         |
| forward              | 5'- ACCTTCTACAATGAGCTGCG -3'    |             |
| reverse              | 5'- CCTGGATAGCAACGTACATGG -3'   |             |
| Human <i>CTNNB1</i>  |                                 | 150         |
| forward              | 5'- GTTCAGTTGCTTGTTTCGTGC -3'   |             |
| reverse              | 5'- GTTGTGAACATCCCGAGCTAG -3'   |             |
| Human <i>DCLK1</i>   |                                 | 118         |
| forward              | 5'- AAAGTCTGCAGCTCGATGG -3'     |             |
| reverse              | 5'- CATCTCCTATTGTTCTTCCGACT -3' |             |
| Murine <i>Actb</i>   |                                 | 147         |
| forward              | 5'- ACCTTCTACAATGAGCTGCG -3'    |             |
| reverse              | 5'- CTGGATGGCTACGTACATGG -3'    |             |
| Murine <i>Ctnnb1</i> |                                 | 135         |
| forward              | 5'- GCTATTCCACGACTAGTTCAGC -3'  |             |
| reverse              | 5'- AGCTCCAGTACACCCTTCTAC -3'   |             |
| Murine <i>Delk1</i>  |                                 | 83          |
| forward              | 5'- TGCCGACTGAACTGTATCTTG -3'   |             |
| Reverse              | 5'- TGTGTATTTGCTAGTGGAGGTG -3'  |             |

Supplementary Table 2: Primary antibodies and dilution used in this study

| Application and antigen            | Vendor                    | Catalogue Number | Host   | Clonality | Dilution |
|------------------------------------|---------------------------|------------------|--------|-----------|----------|
| <i>Western blotting</i>            |                           |                  |        |           |          |
| Active $\beta$ -catenin            | Cell Signaling Technology | 4270             | rabbit | Poly      | 1:1,000  |
| $\beta$ -actin                     | Santa Cruz Biotechnology  | sc-81178         | Mouse  | Mono      | 1:2,000  |
| c-Myc                              | Santa Cruz Biotechnology  | sc-40            | mouse  | Mono      | 1:500    |
| CD44                               | Cell Signaling Technology | 5640             | Mouse  | Mono      | 1:500    |
| Dclk1                              | Abgent                    | AP7219b          | Rabbit | Poly      | 1:1,000  |
| Klf4                               | Millipore                 | 09-821           | Rabbit | Poly      | 1:500    |
| Oct3/4                             | Santa Cruz Biotechnology  | sc-9081          | Rabbit | Poly      | 1:200    |
| p-Gsk3 $\beta$ (Ser <sup>9</sup> ) | Santa Cruz Biotechnology  | sc-11757         | Goat   | Poly      | 1:200    |
| Sox2                               | Abgent                    | AP2048D          | Rabbit | Poly      | 1:1,000  |
| Tcf4                               | Santa Cruz Biotechnology  | sc-8631          | Goat   | Poly      | 1:200    |
| Wif1                               | Cell Signaling Technology | 2064             | Rabbit | Poly      | 1:1,000  |
| Wnt3 $\alpha$                      | R&D Systems MAB1324       | MAB1324          | Rat    | Mono      | 1:400    |
| <i>IHC &amp; IF staining</i>       |                           |                  |        |           |          |
| Active $\beta$ -catenin            | Millipore                 | 05-665           | Mouse  | Mono      | 1:250    |
| c-Myc                              | Abgent                    | AP1985B          | rabbit | Poly      | 1:25     |
| Dclk1                              | Abgent                    | AP7219b          | Rabbit | Poly      | 1:50     |
| Klf4                               | Millipore                 | 09-821           | Rabbit | Poly      | 1:100    |
| Oct3/4                             | Santa Cruz Biotechnology  | sc-9081          | Rabbit | Poly      | 1:100    |
| Sox2                               | Cell Signaling Technology | 3728             | Rabbit | Mono      | 1:50     |
